# Supplementary material
Source: PubMed Central journal article supplement (PMC4681865)
Supplement: ismej201590x5.pdf [file ismej201590x5.pdf]

**Figure S4:** Weather conditions during experimental run.

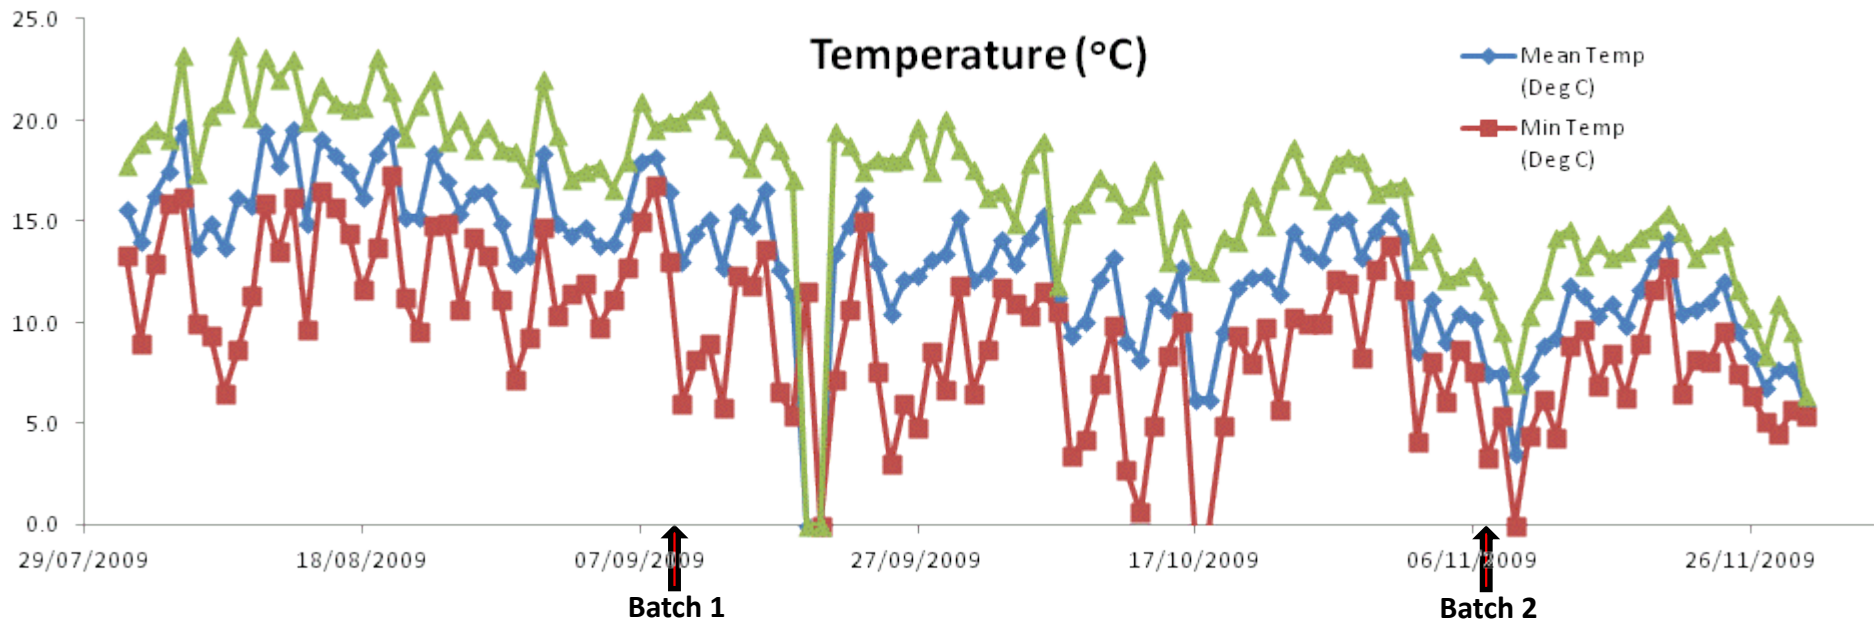

**(A)**

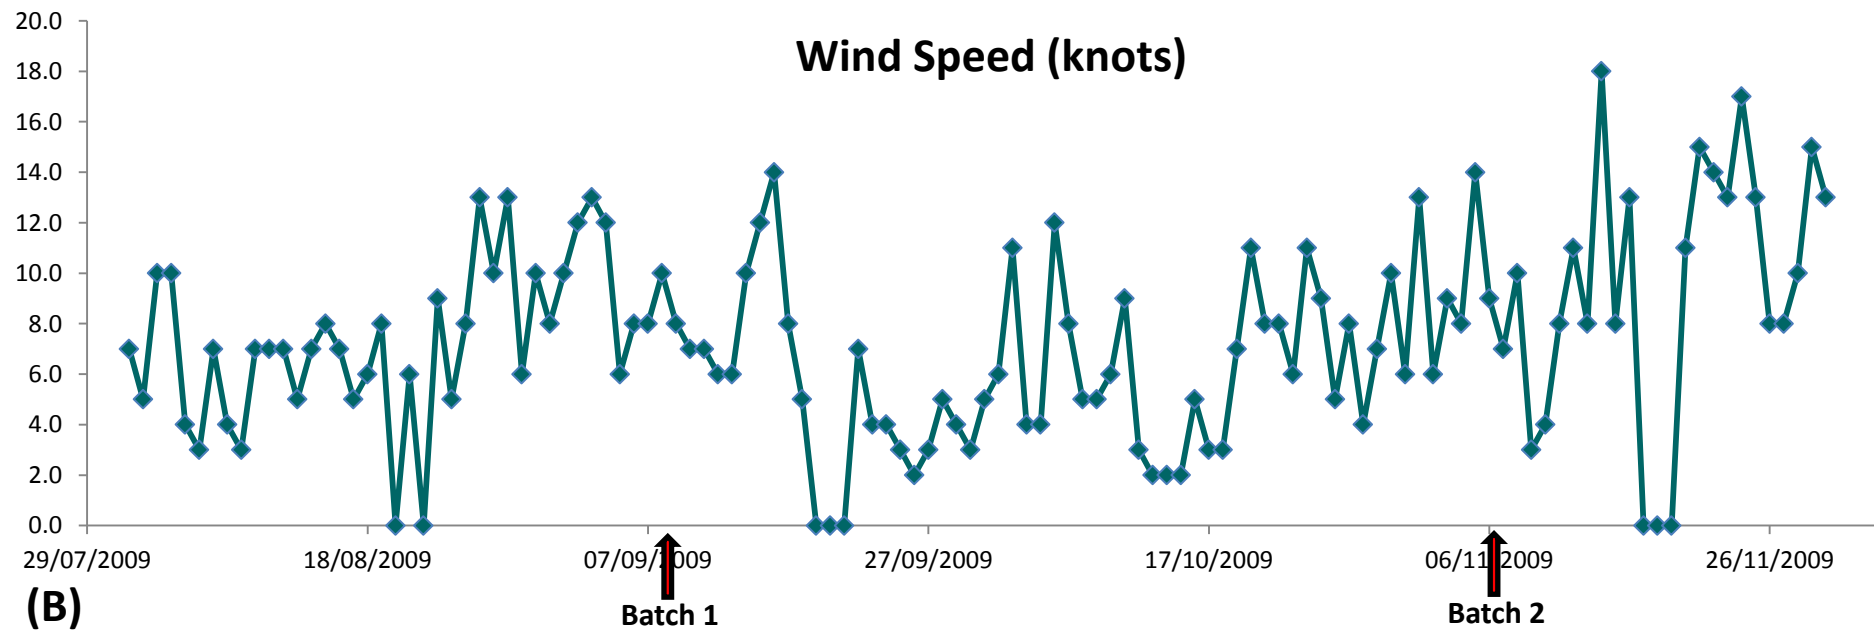

**(B)**

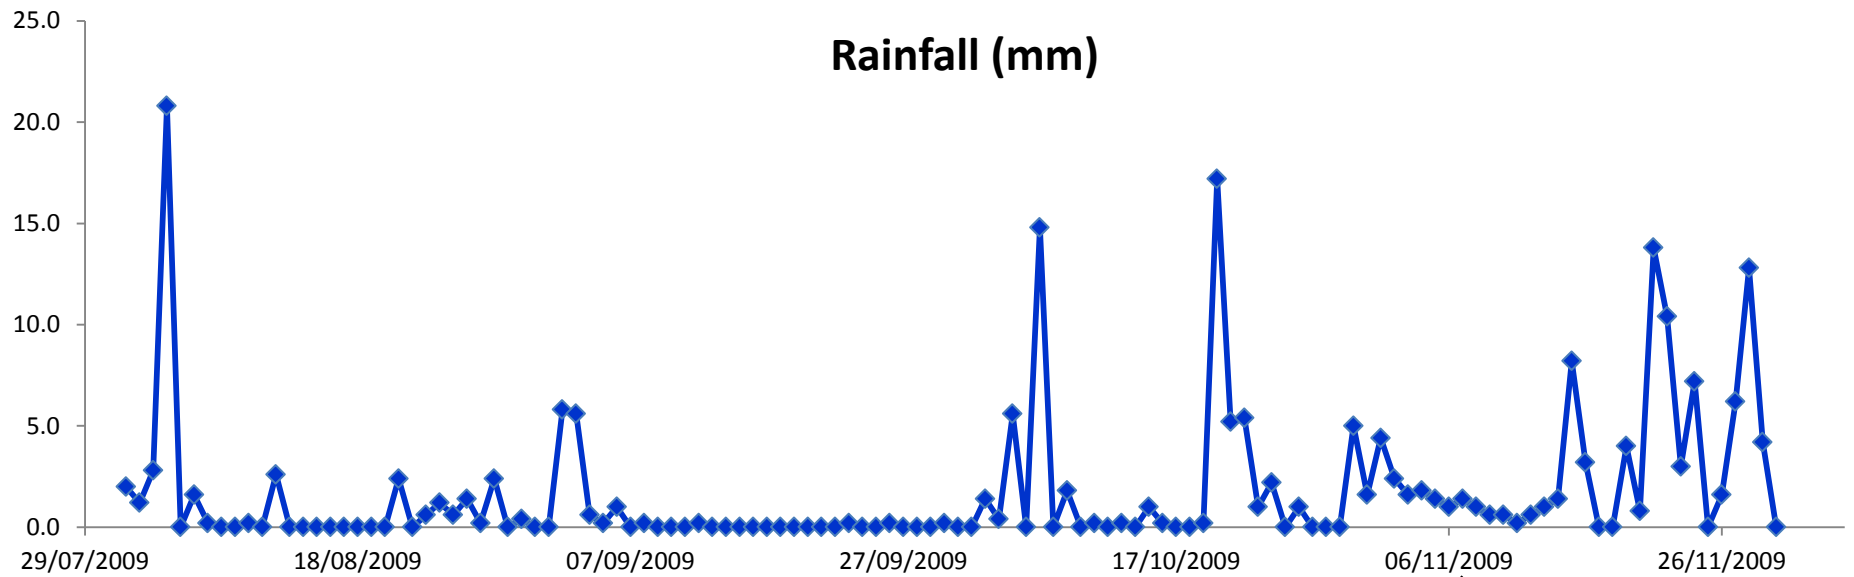

**(C)**

↑  
**Batch 1**

↑  
**Batch 2**

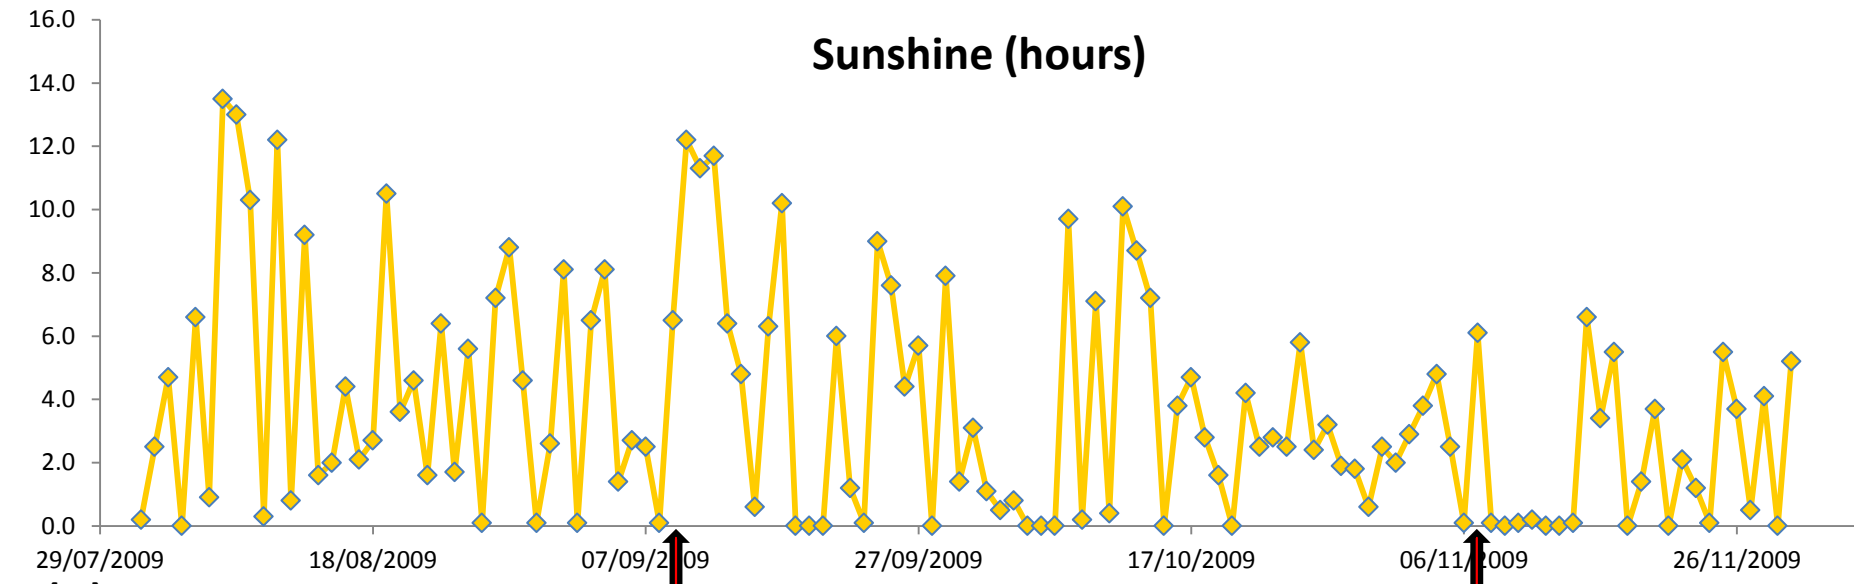

**(D)**

↑  
**Batch 1**

↑  
**Batch 2**

# Global Radiation (kjm2)

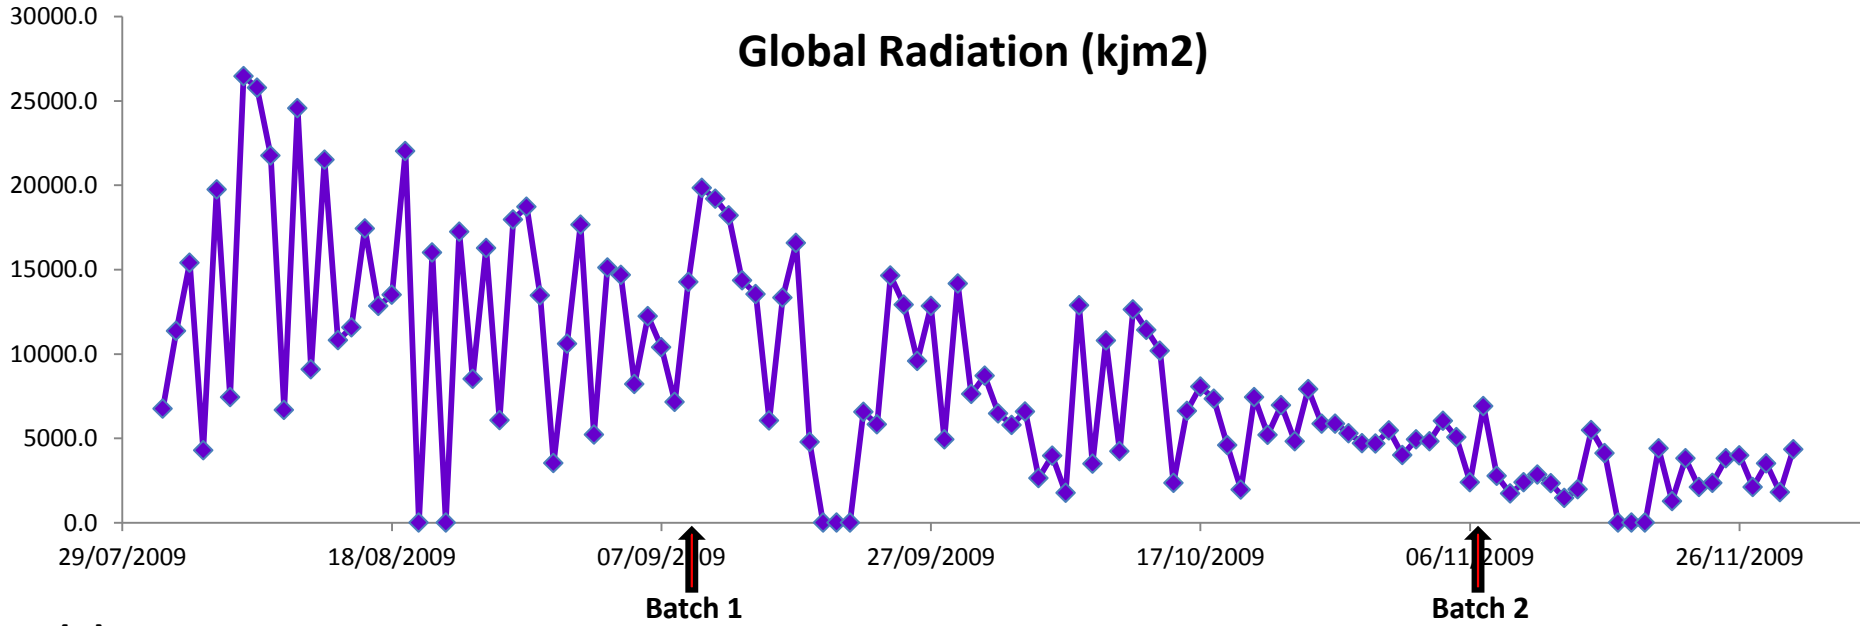

(E)
