# Supplementary material
Source: PubMed Central journal article supplement (PMC4681865)

Figure S2

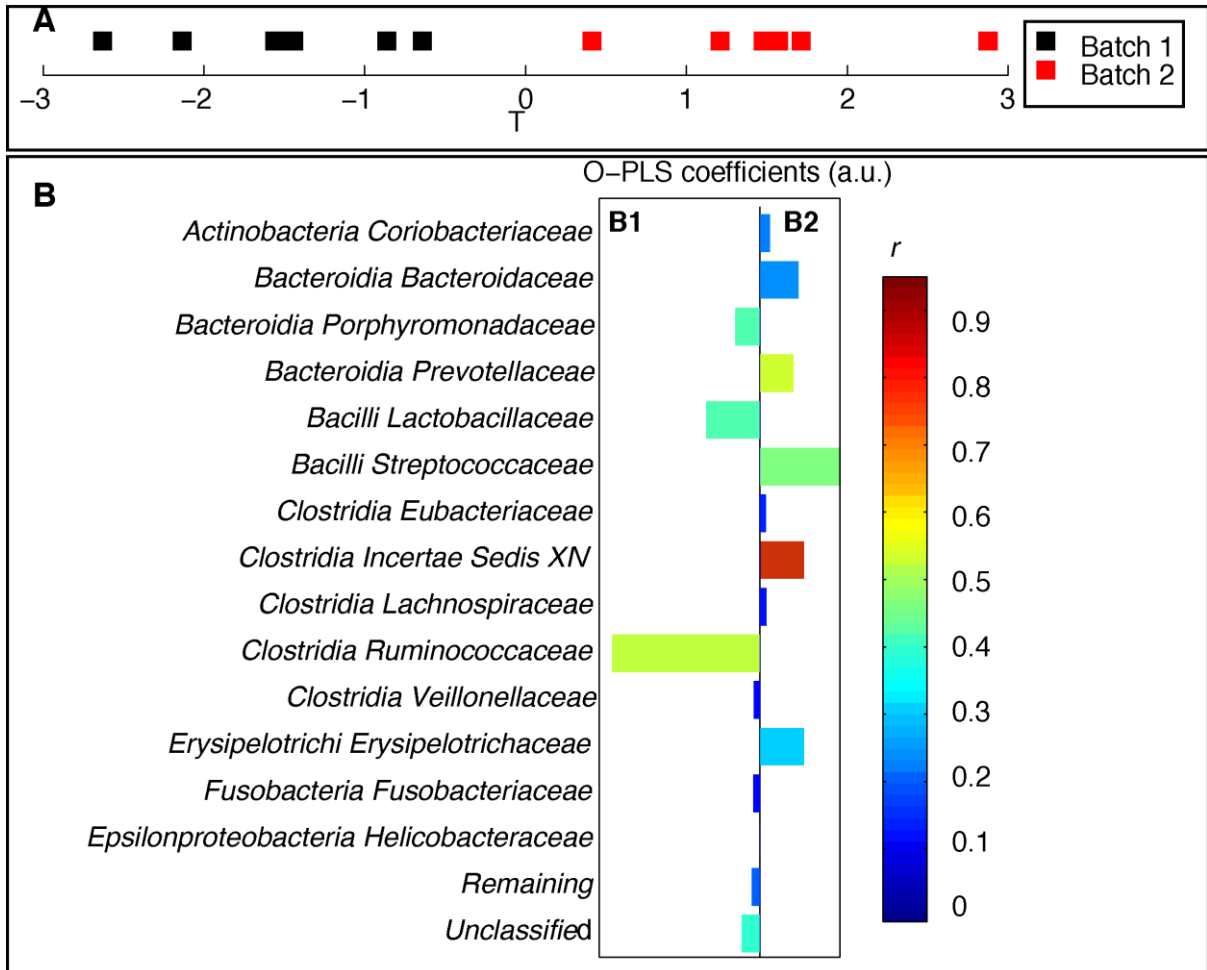

Supplement: ismej201590x3.pdf [file ismej201590x3.pdf]

Figure S3

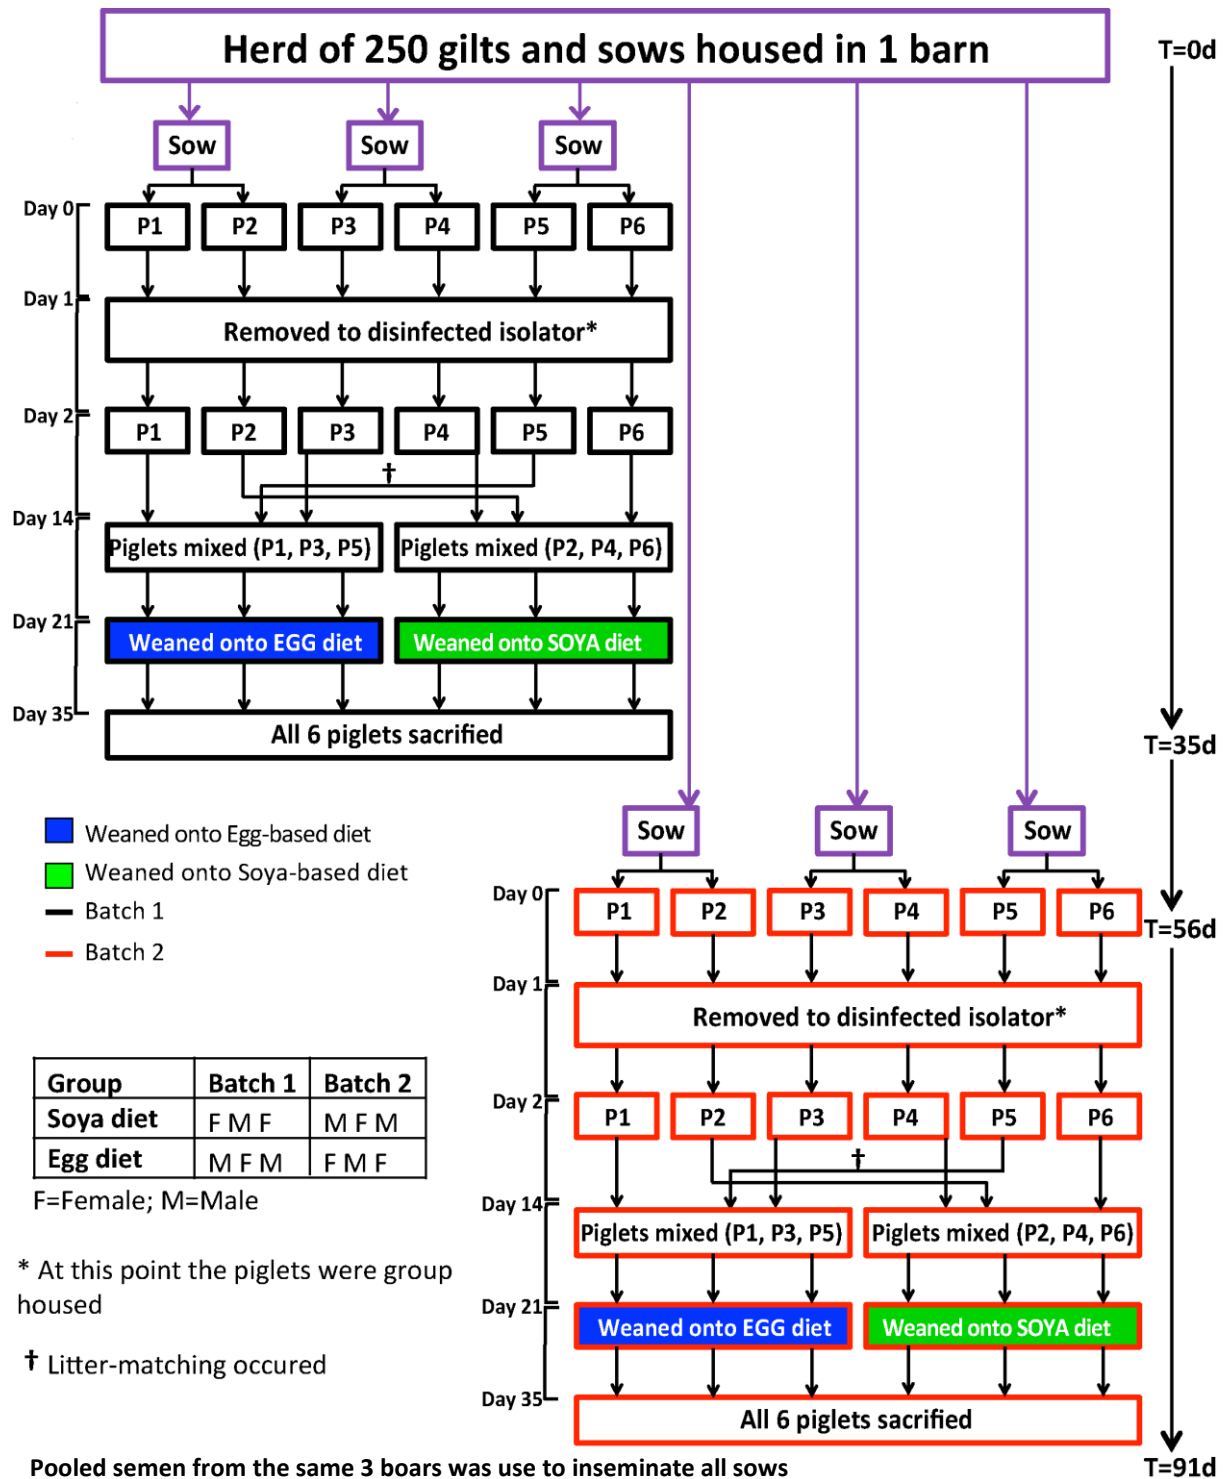

Supplement: ismej201590x4.pdf [file ismej201590x4.pdf]
